# Supplementary material
Source: PubMed Central journal article supplement (PMC5252827)
Supplement: NIHMS813166-supplement-01.pdf [file NIHMS813166-supplement-01.pdf]

Supplemental Table 1: Baseline Characteristics of Heart Transplant Recipients (2002-2011)  
Stratified by Public Insurance, Medicare, or Medicaid.

| Characteristic                | Total         | Private      | Medicare     | Medicaid     | p Value |
|-------------------------------|---------------|--------------|--------------|--------------|---------|
| Sample size, n                | 17,239        | 9,925        | 5,157        | 2,157        |         |
| Age, y, mean (SD)             | 52.0 (12.5)   | 51.3 (11.8)  | 57.3 (10.8)  | 43.2 (13.8)  | <.001   |
| Female sex, n (%)             | 4,233 (24.6)  | 2406 (24.2)  | 1113 (21.6)  | 714 (33.1)   | <.001   |
| Race/ethnicity, n (%)         |               |              |              |              |         |
| Caucasian                     | 12,406 (71.8) | 7,659 (77.2) | 3,653 (70.9) | 1,094 (50.7) | <.001   |
| African American              | 3,033 (17.6)  | 1,358 (13.6) | 1,008 (19.5) | 667 (30.9)   |         |
| Asian                         | 411 (2.4)     | 274 (2.8)    | 83 (1.6)     | 54 (2.5)     |         |
| Hispanic                      | 1,242 (7.2)   | 561 (5.7)    | 367 (7.1)    | 314 (14.6)   |         |
| Other                         | 146 (0.9)     | 73 (0.7)     | 45 (0.9)     | 28 (1.3)     |         |
| BMI, units, mean (SD)*        | 26.9 (8.4)    | 26.7 (10.0)  | 27.2 (4.8)   | 26.8 (6.4)   | <.001   |
| Education, n (%)†             |               |              |              |              |         |
| Less than high school         | 530 (3.8)     | 197 (2.5)    | 199 (4.8)    | 134 (7.8)    | <.001   |
| High school                   | 6,113 (44.2)  | 3,065 (36.7) | 2,050 (49.1) | 998 (58.0)   |         |
| Some college                  | 3,580 (25.9)  | 2,127 (26.8) | 1,021 (24.3) | 432 (25.0)   |         |
| ≥ 4 years college             | 3,601 (26.1)  | 2,534 (32.0) | 909 (21.8)   | 158 (9.2)    |         |
| Diabetes, n (%)*              | 4,266 (24.8)  | 2,280 (23.0) | 1,535 (29.8) | 451 (20.9)   | <.001   |
| HTN, n (%)*                   | 6,998 (44.5)  | 3,823 (42.4) | 2,352 (50.2) | 823 (40.8)   | <.001   |
| Albumin, g/dL, mean (SD)†     | 3.7 (0.7)     | 3.7 (0.7)    | 3.7 (0.7)    | 3.6 (0.7)    | <.001   |
| Creatinine, mg/dL, mean (SD)* | 1.30 (0.7)    | 1.30 (0.6)   | 1.36 (0.8)   | 1.20 (0.6)   | <.001   |

\* Missing for <10%

† Missing for 10% to 20%

HTN, hypertension

Supplemental Table 2: Baseline Characteristics of Lung Transplant Recipients (2002-2011)  
Stratified by Public Insurance, Medicare, or Medicaid.

| Characteristic                 | Total         | Private      | Medicare     | Medicaid    | p Value |
|--------------------------------|---------------|--------------|--------------|-------------|---------|
| Sample size, n                 | 13,206        | 7,964 (60.3) | 4,271 (32.3) | 971 (7.4)   |         |
| Age, y, mean (SD)              | 53.3 (13.1)   | 52.1 (12.4)  | 57.8 (11.9)  | 43.0 (15.6) | <.001   |
| Female sex, n (%)              | 5771 (43.7)   | 3446 (43.3)  | 1805 (42.3)  | 520 (53.6)  | <.001   |
| Race/ethnicity, n (%)          |               |              |              |             |         |
| Caucasian                      | 11,269 (85.3) | 6,853 (86.1) | 3,691 (86.4) | 725 (74.7)  | <.001   |
| African American               | 1,061 (8.0)   | 600 (7.5)    | 342 (8.0)    | 119 (12.3)  |         |
| Asian                          | 161 (1.2)     | 115 (1.4)    | 36 (0.8)     | 10 (1.0)    |         |
| Hispanic                       | 630 (4.8)     | 349 (4.4)    | 172 (4.0)    | 109 (11.2)  |         |
| Other                          | 85 (0.6)      | 47 (0.6)     | 30 (0.6)     | 8 (0.8)     |         |
| BMI, units, mean (SD) *        | 24.7 (4.9)    | 24.8 (5.1)   | 25.0 (4.5)   | 23.3 (5.0)  | <.001   |
| Education, n (%) †             |               |              |              |             |         |
| Less than high school          | 354 (3.1)     | 144 (2.1)    | 144 (3.9)    | 66 (7.6)    | <.001   |
| High school                    | 4,903 (42.6)  | 2,591 (37.3) | 1,816 (48.8) | 496 (56.9)  |         |
| Some college                   | 3,001 (26.0)  | 1,876 (27.1) | 932 (25.0)   | 193 (22.1)  |         |
| ≥ 4 years college              | 3,266 (28.3)  | 2,318 (33.5) | 831 (22.3)   | 117 (13.4)  |         |
| Diabetes, n (%) *              | 2,318 (17.6)  | 1,354 (17.0) | 749 (17.6)   | 215 (22.1)  | <.001   |
| HTN, n (%) †                   | 2,930 (24.8)  | 1,655 (23.3) | 1,101 (28.7) | 174 (19.8)  | <.001   |
| Albumin, g/dL, mean (SD) †     | 3.9 (0.6)     | 3.9 (0.6)    | 4.0 (0.6)    | 3.8 (0.7)   | <.001   |
| Creatinine, mg/dL, mean (SD) * | 0.90 (0.5)    | 0.90 (0.5)   | 0.90 (0.4)   | 0.88 (0.8)  | <.001   |

\* Missing for <10%

† Missing for 10% to 20%

HTN, hypertension

Supplemental Table 3: Baseline Characteristics of Liver Transplant Recipients (2002-2011)  
Stratified by Public Insurance, Medicare, or Medicaid.

| <b>Characteristic</b>         | <b>Total</b>  | <b>Private</b> | <b>Medicare</b> | <b>Medicaid</b> | <b>p Value</b> |
|-------------------------------|---------------|----------------|-----------------|-----------------|----------------|
| Sample size, n                | 48,201        | 30,941         | 10,158          | 7,102           |                |
| Age, y, mean (SD)             | 53.1 (10.2)   | 52.4 (9.5)     | 58.1 (9.8)      | 48.9 (10.7)     | <.001          |
| Female sex, n (%)             | 15,922 (33.0) | 9,524 (30.8)   | 3,698 (36.4)    | 2700 (38.0)     | <.001          |
| Race/ethnicity, n (%)         |               |                |                 |                 |                |
| Caucasian                     | 35,026 (72.7) | 23,601 (76.3)  | 7,277 (71.6)    | 4,148 (58.4)    | <.001          |
| African American              | 4,451 (9.2)   | 2,716 (8.8)    | 847 (8.3)       | 888 (12.5)      |                |
| Asian                         | 2,190 (4.5)   | 1,405 (4.5)    | 394 (3.9)       | 391 (5.5)       |                |
| Hispanic                      | 6,043 (12.5)  | 2,951 (9.5)    | 1,535 (15.1)    | 1,557 (21.9)    |                |
| Other                         | 491 (1.1)     | 268 (0.9)      | 105 (1.1)       | 118 (1.7)       |                |
| BMI, units, mean (SD)*        | 28.2 (6.2)    | 28.2 (6.4)     | 28.4 (5.8)      | 28.0 (6.1)      | <.001          |
| Education, n (%)†             |               |                |                 |                 |                |
| Less than high school         | 2,030 (5.3)   | 697 (2.8)      | 642 (8.0)       | 691 (12.3)      | <.001          |
| High school                   | 18,315 (48.0) | 10,715 (43.7)  | 4,209 (52.3)    | 3,391 (60.5)    |                |
| Some college                  | 9,200 (24.0)  | 6,399 (26.1)   | 1,757 (21.8)    | 1,044 (18.6)    |                |
| ≥ 4 years college             | 8,651 (22.7)  | 6,726 (27.4)   | 1,443 (17.9)    | 482 (8.6)       |                |
| Diabetes, n (%)*              | 11,706 (24.3) | 7,051 (22.8)   | 3,073 (30.3)    | 1,582 (22.3)    | <.001          |
| HTN, n (%)*                   | 8,853 (21.5)  | 5,452 (20.6)   | 2,219 (25.4)    | 1,182 (19.5)    | <.001          |
| Albumin, g/dL, mean (SD)‡     | 3.0 (0.7)     | 3.0 (0.7)      | 3.0 (0.6)       | 2.9 (0.7)       | <.001          |
| Creatinine, mg/dL, mean (SD)‡ | 0.90 (0.5)    | 0.90 (0.5)     | 0.90 (0.4)      | 0.88 (0.8)      | <.001          |

\* Missing for <10%

† Missing for 10% to 20%

‡ Missing for >20%

HTN, hypertension

Supplemental Table 4: Baseline Characteristics of Renal Transplant Recipients (2002-2011)  
Stratified by Public Insurance, Medicare or Medicaid.

| Characteristic                            | Total         | Private       | Medicare      | Medicaid     | p Value |
|-------------------------------------------|---------------|---------------|---------------|--------------|---------|
| Sample size, n                            | 90,548        | 25,970        | 60,217        | 4,361        |         |
| Age, y, mean (SD)                         | 51.7 (13.2)   | 51.5 (11.8)   | 52.2 (13.5)   | 45.4 (14.1)  | <.001   |
| Female sex, n (%)                         | 36,052 (39.8) | 10,441 (40.2) | 23,563 (39.1) | 2048 (47.0)  | <.001   |
| Race/ethnicity, n (%)                     |               |               |               |              |         |
| Caucasian                                 | 42,380 (46.8) | 15,190 (58.5) | 26,068 (43.3) | 1,122 (25.7) | <.001   |
| African American                          | 28,821 (31.8) | 6,289 (24.2)  | 21,063 (35.0) | 1,469 (33.7) |         |
| Asian                                     | 5,179 (5.7)   | 1,635 (6.3)   | 3,117 (5.2)   | 427 (9.8)    |         |
| Hispanic                                  | 12,534 (13.8) | 2,506 (9.7)   | 8,796 (14.5)  | 1,232 (28.3) |         |
| Other                                     | 1,633 (1.9)   | 350 (1.3)     | 1,173 (2.0)   | 110 (2.5)    |         |
| BMI, units, mean (SD)                     | 27.8 (6.4)    | 27.8 (6.5)    | 27.8 (6.4)    | 26.6 (5.7)   |         |
| Education, n (%) <sup>†</sup>             |               |               |               |              |         |
| Less than high school                     | 5,867 (7.7)   | 801 (3.7)     | 4,398 (8.6)   | 668 (19.5)   | <.001   |
| High school                               | 36,895 (48.2) | 8,921 (40.9)  | 26,009 (50.7) | 1,965 (57.2) |         |
| Some college                              | 18,278 (23.9) | 5,755 (26.4)  | 12,004 (23.4) | 519 (15.1)   |         |
| ≥ 4yrs college                            | 15,460 (20.2) | 6,328 (29.0)  | 8,850 (17.3)  | 282 (8.2)    |         |
| Diabetes, n (%) <sup>*</sup>              | 30,821 (34.1) | 8,422 (32.5)  | 21,127 (35.2) | 1,272 (29.3) | <.001   |
| HTN, n (%) <sup>*</sup>                   | 70,856 (85.5) | 19,880 (84.5) | 47,670 (86.2) | 3,306 (82.2) | <.001   |
| Albumin, g/dL, mean (SD) <sup>‡</sup>     | 3.9 (0.6)     | 3.9 (0.6)     | 3.9 (0.6)     | 3.9 (0.6)    | <.001   |
| Creatinine, mg/dL, mean (SD) <sup>*</sup> | 8.3 (3.4)     | 7.9 (3.4)     | 8.5 (3.4)     | 8.5 (3.4)    | <.001   |

\* Missing for <10%

<sup>†</sup>Missing for 10% to 20%

<sup>‡</sup>Missing for >20%

HTN, hypertension

Supplemental Table 5: State-Level Population and Medicaid Data from 2010-2011 Used to Create Figures 2A and 2B.

| State                   | Expected                           |                           |                              | Observed<br>adult transplant recipients |                         |                              | O/E<br>ratio |
|-------------------------|------------------------------------|---------------------------|------------------------------|-----------------------------------------|-------------------------|------------------------------|--------------|
|                         | Adult<br>Medicaid<br>population, n | Adult<br>population,<br>n | Medicaid<br>proportion,<br>n | Medicaid<br>recipients,<br>n            | All<br>recipients,<br>n | Medicaid<br>proportion,<br>n |              |
| Alabama                 | 302000                             | 2992600                   | 0.101                        | 14                                      | 525                     | 0.027                        | 0.26         |
| Alaska                  | 42100                              | 374700                    | 0.112                        | 4                                       | 37                      | 0.108                        | 0.96         |
| Arizona                 | 609900                             | 3894800                   | 0.157                        | 72                                      | 707                     | 0.102                        | 0.65         |
| Arkansas                | 179000                             | 1692300                   | 0.106                        | 18                                      | 305                     | 0.059                        | 0.56         |
| California              | 3557200                            | 21581500                  | 0.165                        | 620                                     | 3959                    | 0.157                        | 0.95         |
| Colorado                | 316000                             | 3072700                   | 0.103                        | 35                                      | 483                     | 0.072                        | 0.70         |
| Connecticut             | 291600                             | 2383600                   | 0.122                        | 31                                      | 407                     | 0.076                        | 0.62         |
| Delaware                | 82600                              | 604100                    | 0.137                        | 4                                       | 145                     | 0.028                        | 0.20         |
| District of<br>Columbia | 99700                              | 464200                    | 0.215                        | 15                                      | 72                      | 0.208                        | 0.97         |
| Florida                 | 1137700                            | 11169700                  | 0.102                        | 233                                     | 2604                    | 0.089                        | 0.88         |
| Georgia                 | 446400                             | 5256000                   | 0.085                        | 53                                      | 1054                    | 0.050                        | 0.59         |
| Hawaii                  | 116600                             | 891000                    | 0.131                        | 6                                       | 117                     | 0.051                        | 0.39         |
| Idaho                   | 73600                              | 901100                    | 0.082                        | 1                                       | 94                      | 0.011                        | 0.13         |
| Illinois                | 854900                             | 7798700                   | 0.110                        | 180                                     | 1540                    | 0.117                        | 1.07         |
| Indiana                 | 470400                             | 3924300                   | 0.120                        | 47                                      | 719                     | 0.065                        | 0.55         |
| Iowa                    | 228700                             | 1971200                   | 0.116                        | 26                                      | 368                     | 0.071                        | 0.61         |
| Kansas                  | 128100                             | 1684600                   | 0.076                        | 24                                      | 343                     | 0.070                        | 0.92         |
| Kentucky                | 339800                             | 2625500                   | 0.129                        | 51                                      | 494                     | 0.103                        | 0.80         |
| Louisiana               | 348800                             | 2540700                   | 0.137                        | 63                                      | 599                     | 0.105                        | 0.77         |
| Maine                   | 196600                             | 912000                    | 0.216                        | 9                                       | 93                      | 0.097                        | 0.45         |
| Maryland                | 323500                             | 3719600                   | 0.087                        | 56                                      | 933                     | 0.060                        | 0.69         |
| Massachusetts           | 911100                             | 4811600                   | 0.189                        | 75                                      | 747                     | 0.100                        | 0.53         |
| Michigan                | 817900                             | 6252900                   | 0.131                        | 69                                      | 1215                    | 0.057                        | 0.43         |
| Minnesota               | 393100                             | 3543000                   | 0.111                        | 51                                      | 484                     | 0.105                        | 0.95         |
| Mississippi             | 249800                             | 1711400                   | 0.146                        | 26                                      | 400                     | 0.065                        | 0.45         |
| Missouri                | 380500                             | 3725400                   | 0.102                        | 75                                      | 810                     | 0.093                        | 0.91         |
| Montana                 | 44500                              | 583900                    | 0.076                        | 3                                       | 65                      | 0.046                        | 0.61         |
| Nebraska                | 80000                              | 1144600                   | 0.070                        | 22                                      | 227                     | 0.097                        | 1.39         |
| Nevada                  | 114700                             | 1489300                   | 0.077                        | 7                                       | 213                     | 0.033                        | 0.43         |
| New<br>Hampshire        | 40400                              | 859000                    | 0.047                        | 4                                       | 102                     | 0.039                        | 0.83         |
| New Jersey              | 502000                             | 5394700                   | 0.093                        | 60                                      | 1196                    | 0.050                        | 0.54         |
| New Mexico              | 170600                             | 1154900                   | 0.148                        | 14                                      | 220                     | 0.064                        | 0.43         |
| New York                | 2624800                            | 12747300                  | 0.206                        | 272                                     | 2299                    | 0.118                        | 0.57         |

|                |         |          |       |     |      |       |      |
|----------------|---------|----------|-------|-----|------|-------|------|
| North Carolina | 611200  | 5575200  | 0.110 | 57  | 1367 | 0.042 | 0.38 |
| North Dakota   | 24200   | 446900   | 0.054 | 4   | 62   | 0.065 | 1.19 |
| Ohio           | 810200  | 7211500  | 0.112 | 100 | 1182 | 0.085 | 0.75 |
| Oklahoma       | 213600  | 2141400  | 0.100 | 22  | 383  | 0.057 | 0.58 |
| Oregon         | 286000  | 2424300  | 0.118 | 21  | 271  | 0.077 | 0.66 |
| Pennsylvania   | 970000  | 8556600  | 0.113 | 148 | 1810 | 0.082 | 0.72 |
| Rhode Island   | 90800   | 678000   | 0.134 | 0   | 74   | 0     | 0    |
| South Carolina | 356500  | 2811000  | 0.127 | 31  | 623  | 0.050 | 0.39 |
| South Dakota   | 42600   | 496700   | 0.086 | 6   | 85   | 0.071 | 0.82 |
| Tennessee      | 528100  | 3913900  | 0.135 | 52  | 789  | 0.066 | 0.49 |
| Texas          | 1224200 | 13131600 | 0.093 | 104 | 2820 | 0.037 | 0.40 |
| Utah           | 119400  | 1546700  | 0.077 | 16  | 242  | 0.066 | 0.86 |
| Vermont        | 94800   | 439100   | 0.216 | 7   | 78   | 0.090 | 0.42 |
| Virginia       | 360500  | 4831600  | 0.075 | 49  | 952  | 0.051 | 0.69 |
| Washington     | 450100  | 4104800  | 0.110 | 43  | 663  | 0.065 | 0.59 |
| West Virginia  | 158000  | 1168400  | 0.135 | 18  | 217  | 0.083 | 0.61 |
| Wisconsin      | 484400  | 3741900  | 0.129 | 51  | 663  | 0.077 | 0.59 |
| Wyoming        | 30400   | 337200   | 0.090 | 3   | 43   | 0.070 | 0.77 |

O/E, observed to expected
